# Supplementary material for: Protection against malaria in mice is induced by blood stage–arresting histamine-releasing factor (HRF)–deficient parasites
Source: PubMed Central journal article supplement — J Exp Med. 2016 Jul 25;213(8):1419–28. doi: 10.1084/jem.20151976 (PMC4986535; doi:10.1084/jem.20151976), 2016-07-25
Supplement: supp_jem.20151976_JEM_20151976_sm.pdf [file supp_jem.20151976_JEM_20151976_sm.pdf]

SUPPLEMENTAL MATERIAL

Demarta-Gatsi et al., <http://www.jem.org/cgi/content/full/jem.20151976/DC1>

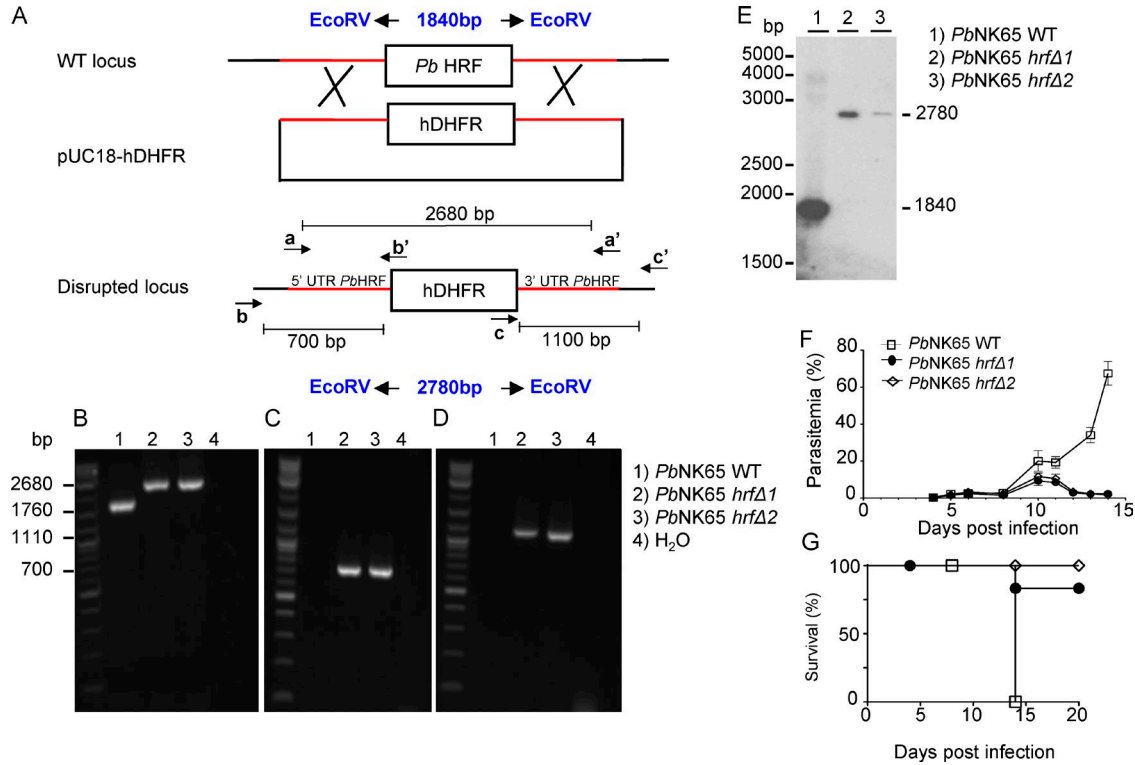

Figure S1. **Disruption of the *pbhfrf* gene in *PbNK65* parasites.** (A) Schematic representation of the strategy used to delete the *pbhfrf* open reading frame in *PbNK65* parasites using double-crossover homologous recombination. Red lines represent regions of homology. Successful recombination disrupts the HRF-coding sequence and replaces it with the drug resistance marker *hDHFR*. (B–D) Specific PCR primers (Table S2) were used to assess genomic integration of *hDHFR* in *PbNK65-hrfΔ* clones. The primers used for PCR analysis include a + a' (B), b + b' (C), and c + c' (D), with gDNA from the following: lane 1, WT parasites; lane 2, *hrfΔ* clone 1; lane 3, *hrfΔ* clone 2; and lane 4, H<sub>2</sub>O. (E) Southern blot analysis of the *pbhfrf* locus in *PbNK65* WT, *PbNK65 hrfΔ1*, and *PbNK65 hrfΔ2* mutant locus in *PbNK65* parasites. WT locus = 1,840 bp, whereas *hDHFR* insertion = 2,780 bp. (F and G) C57BL/6 mice were inoculated with either 10<sup>5</sup> GFP-expressing WT, *PbNK65-hrfΔ1*, or *PbNK65-hrfΔ2* iRBCs, and parasitemia (F) or survival (Kaplan-Meier survival plots; log-rank test; n = 11; P = 0.007; G) was followed over time. Error bars, SEM. Experiments were replicated three times.

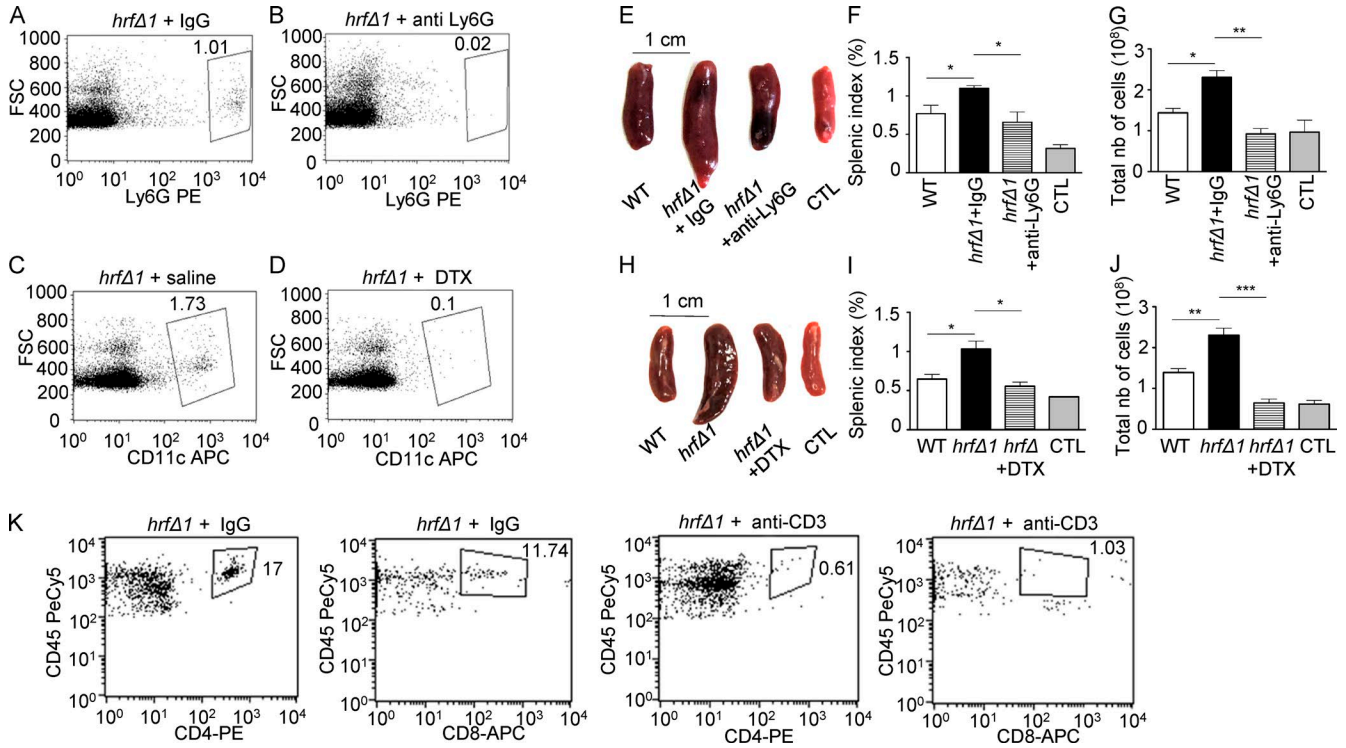

Figure S2. **Assessment of leukocyte depletion and role of neutrophils and DCs in the occurrence of splenomegaly.** (A and B) In vivo depletion of neutrophils using antineutrophil antibody (B) or normal IgG (A) was assessed by measuring at day 6 p.i. the percentage of residual Ly6G<sup>+</sup> neutrophils in spleens by FACS analysis. (C and D) Depletion of DCs was performed by injection of diphtheria toxin (DTX; D) or saline (C) into CD11c-DTR-GFP mice, and at day 6 p.i., the percentage of CD11c<sup>+</sup> cells was determined in spleens by FACS analysis. (E–J) Comparison at day 6 p.i. of splenic indexes and total number of leukocytes in WT and *PbNK65-hrfΔ1*-infected mice untreated or depleted of neutrophils (E–G) or DCs (H–J). (K) Control of T cell depletion (Fig. 2 G): protected mice received anti-CD3-depleting antibody 1 d before a challenge with WT parasites followed by two booster injections of anti-CD3 at days 1 and 3 after challenge with *PbNK65* WT parasites. T cell depletion efficiency was assessed by FACS analysis using anti-CD4-PE or anti-CD8-APC in blood samples from protected mice that were challenged at day 15 p.i. with *PbNK65* WT parasites. Analysis was performed 10 d after challenge. Error bars, SEM. Data are representative of two independent experiments with five to six mice per group. \*,  $P = 0.028$ ; \*\*,  $P = 0.015$ ; \*\*\*,  $P = 0.009$ ; Mann-Whitney test. CTL, control; FSC, forward side scatter; nb, number.

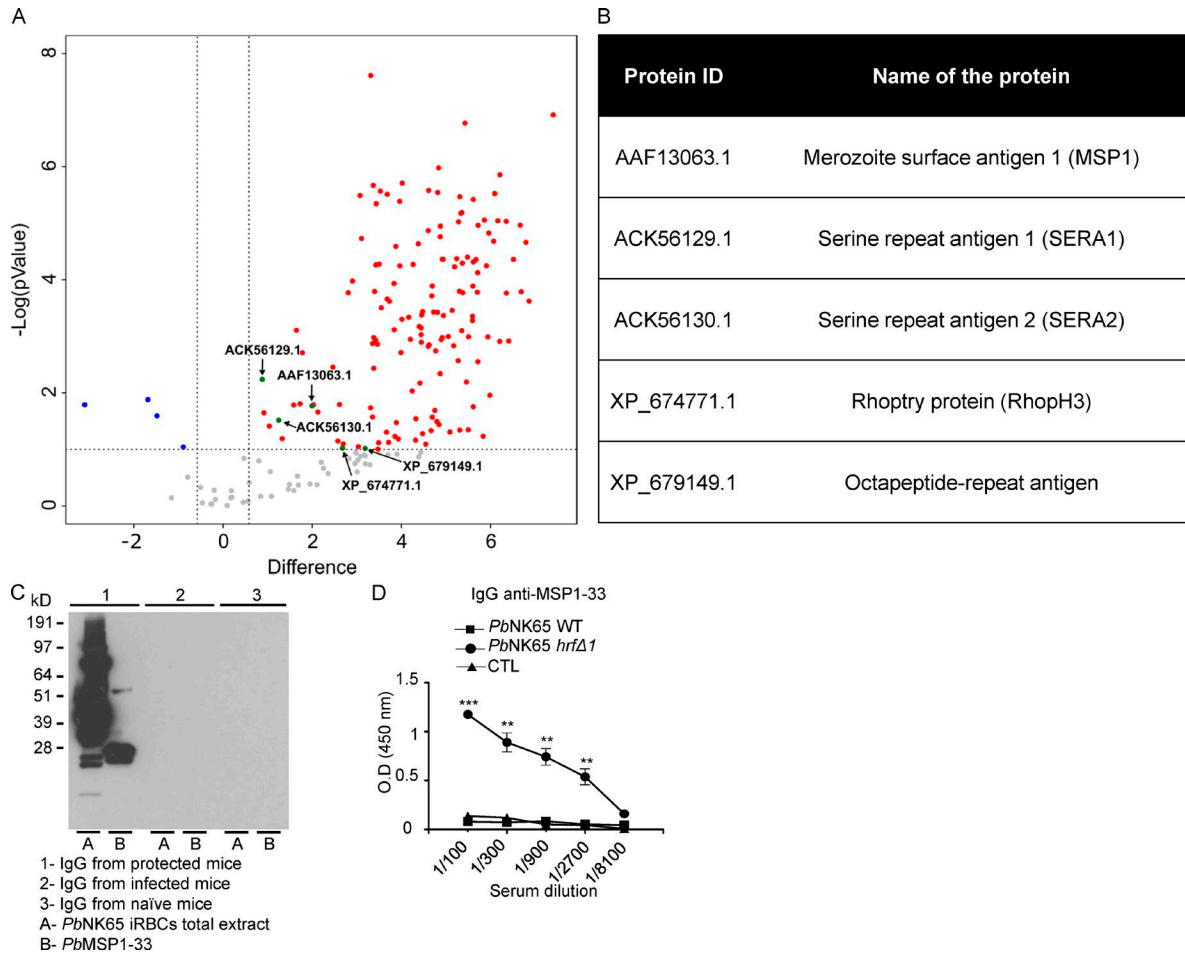

Table S1. List of oligonucleotides used for RT-qPCR analyses

| Primer           | Forward / Reverse | Sequence (5'-3')                      |
|------------------|-------------------|---------------------------------------|
| <i>Pb</i> 18S    | Forward           | ATTAATCTTGAACGAGGAATGGCT              |
|                  | Reverse           | TCAATCGGTAGGAGCGACG                   |
| <i>Pb</i> LSP2   | Forward           | GCCAAATGCTAAACCTAATG                  |
|                  | Reverse           | TGGTTTGTATTGTATGCAC                   |
| <i>Pb</i> HSP70  | Forward           | TGCAGCTAATCAAATC                      |
|                  | Reverse           | ACTTCAATTTGTGGAACACC                  |
| mu IL-23         | Forward           | CCACCAGGACTCAAGGACAACA                |
|                  | Reverse           | GCAGGCTCCCTTTGAAGA                    |
| mu EB13          | Forward           | CAGAGTGCAATGCCATGCTCC                 |
|                  | Reverse           | GCCACACCGAGCCTGTAAGT                  |
| mu IL-12p35      | Forward           | TACTAGAGAGACTTCTCCACAACAAGAG          |
|                  | Reverse           | GATTCTGAAGTGCTGCGTTGAT                |
| mu IL-12p40      | Forward           | GGAAGCACGGCAGCAGAATA                  |
|                  | Reverse           | AACTTGAGGGAGAAGTAGGAATGG              |
| mu IFN- $\gamma$ | Forward           | AAAGGATGCATTTCATGAGTATTGC             |
|                  | Reverse           | CGCTTCTGAGGCTGGATT                    |
| mu IL-6          | Forward           | AAAGAAATGATGGATGCTACCAAAC             |
|                  | Reverse           | CTTGTTATCTTTAAGTTGTTCTTCAT<br>G TACTC |
| mu IL-10         | Forward           | GCGGCTGTCATCGATTTCTC                  |
|                  | Reverse           | GACACCTTGGTCTTGGAGCTTATTAA            |
| mu HPRT          | Forward           | CTGGTGAAGGACCTCTCG                    |
|                  | Reverse           | TGAAGTACTCATTATAGTCAAGGGCA            |

Table S2. List of oligonucleotides used for PCR of WT and recombinant parasites

| Oligonucleotide                   | Sequence (5'-3')                |
|-----------------------------------|---------------------------------|
| Apal-5'UTR- <i>Pb</i> HRF-F (a)   | CGCGGGCCCCGCGCATTATTACCGTTGTCA  |
| PstI-5'UTR- <i>Pb</i> HRF-R       | CGCCTGCAGGGCTTATGCAAGTATCGAACAA |
| KpnI-3'UTR- <i>Pb</i> HRF-F       | CGCGGTACCTTGCTACATGACGCATAAACC  |
| EcoRI-3'UTR- <i>Pb</i> HRF-R (a') | CGCGAATTCTGTGAAATCGACAATGTTTTGG |
| <i>HRF5'</i> -F (b)               | GCGATACAACAATTTATTCAGC          |
| <i>HRF3'</i> -R (c')              | CGCAAGATATCAGAGCTTTTCA          |
| <i>hDHFR3'</i> -F (c)             | TGTTGTCTTTCAATGATTCATAAATAGTTGG |
| <i>hDHFR5'</i> -R (b')            | TGCTTTGAGGGGTGAGCATTTAAAGC      |
| <i>Pb</i> HRF-5'orf-F             | CCATTTGGAATGCGGAAT              |
| <i>Pb</i> HRF-3'orf-R             | TTTTTCTTCAAATAAACCATCTGA        |

Bold letters refer to the oligonucleotide's position in Fig. S1 (A and B).
